# **Title: Mosquito lipids regulate *Plasmodium* sporogony and infectivity to the mammalian host**

Giulia Costa<sup>1</sup>, Maarten Eldering<sup>1,2</sup>, Randall L. Lindquist<sup>3</sup>, Anja E. Hauser<sup>3,4</sup>, Robert Sauerwein<sup>2</sup>, Christian Goosmann<sup>1</sup>, Volker Brinkmann<sup>1</sup> and Elena A. Levashina<sup>1\*</sup>

## **Affiliations:**

<sup>1</sup> Max Planck Institute for Infection Biology, Berlin, Germany

<sup>2</sup> Radboud University Medical Center, Nijmegen, The Netherlands

<sup>3</sup> German Rheumatism Research Centre (DRFZ), Berlin, Germany

<sup>4</sup> Charité-Universitätsmedizin Berlin, Germany

\* Corresponding author: [levashina@mpiib-berlin.mpg.de](mailto:levashina@mpiib-berlin.mpg.de)

# 1 Summary

2

3

4 Malaria is a human parasitic disease that is transmitted by a mosquito vector.

5 *Plasmodium* parasites, the causative agents, differ in their infectivity and virulence to the  
6 mammalian host, but the mechanistic underpinnings of this variation remain unknown.

7 As mosquitoes provide a nutrient-rich niche for development of transmissible stages, we

8 examined the role of lipids in parasite development and infectivity by disrupting lipid

9 trafficking in mosquito adults. We show that depleting the major mosquito lipoprotein

10 lipophorin deprives parasites of neutral lipids, arrests oocysts growth and impairs

11 sporozoite formation. Importantly, lipid deficiency decreases parasite mitochondrial

12 membrane potential and severely compromises sporozoite infectivity and virulence in the

13 mammalian host. Our findings demonstrate the requirement of mosquito lipids for

14 *Plasmodium* metabolism, and uncover the mitochondrial contribution to parasite

15 infectivity and virulence. By drawing a connection between vector nutrition and malaria

16 virulence, our results redefine the paradigm of vector-host-pathogen interactions.

17

18

19

## INTRODUCTION

Nutrition plays a key role in host-pathogen interactions, as parasites hijack host metabolites to survive and propagate. *Plasmodium* parasites, the causative agents of malaria, are no exception. Malaria is the deadliest infectious disease transmitted to humans by anopheline mosquitoes. Multiple reports have implicated larval diet and adult blood meals in determining parasite loads within a mosquito (Moller-Jacobs et al., 2014; Okech et al., 2004; Ponnudurai et al., 1989; Shapiro et al., 2016; Takken et al., 2013; Vantaux et al., 2016). Indeed, females produced by undernourished larvae are poor *Plasmodium* hosts (Moller-Jacobs et al., 2014; Shapiro et al., 2016; Takken et al., 2013; Vantaux et al., 2016), although additional blood feedings improve parasite survival (Okech et al., 2004; Ponnudurai et al., 1989). Together with proteins and carbohydrates, lipids constitute important building blocks of nutrition since they provide living organisms with energy, serve as the structural materials of cell and organelle membranes, and function as signaling molecules. In contrast to the defined role of lipids in *Plasmodium* development within a mammalian host (Grellier et al., 1991; Itoe et al., 2014; Lauer et al., 2000), the contributions of mosquito lipids remain unknown. Mosquitoes acquire lipids from their diet and store them in the fat body, an insect equivalent of mammalian liver. Lipid levels in the tissues are maintained by lipophorin (Lp), the hemolymph-circulating transporter that shuffles hydrophobic lipids between the fat body and energy demanding tissues (Atella et al., 2006; Van der Horst et al., 2009). The blood meal brings to the mosquito massive lipid resources that, in the course of the first days, are routed by Lp from the midgut to the developing ovaries for egg development and to the fat body for storage. Disrupting Lp function aborts ovary development and renders the parasites more vulnerable to the mosquito complement-like system (Mendes et al., 2008; Rono et al., 2010). Here we exploited Lp deficiency to examine the role of mosquito lipids in *Plasmodium* sporogonic development, transmission and virulence to the mammalian host.

## RESULTS

## **Disruption of lipid trafficking between mosquito tissues mitigates *Plasmodium* sporogony**

We first investigated whether Lp depletion disrupts lipid trafficking between mosquito tissues. To this end, females were injected with *dsRNA* against Lp and then fed on *Plasmodium*-infected blood. Lipid content of the tissues was gauged by Nile Red staining (Rudolf and Curcio, 2009). In control mosquitoes, blood feeding significantly increased levels of the Nile Red signal in the midgut and in the ovaries, but no change was observed in the fat body (Figure 1, A and B). While Lp depletion transiently increased lipid levels in the midgut, it abrogated the feeding-induced increase in lipid levels in the ovaries (Figure 1, A and B). Again, no changes in lipid levels were detected in the fat body. We conclude that blocking the blood meal-induced lipid trafficking by Lp depletion efficiently disrupts lipid transport between mosquito tissues.

We next examined the effects of disruption of lipid trafficking on *Plasmodium* development. To prevent large losses at early stages of parasite development inflicted by the mosquito complement-like system in the absence of Lp (Mendes et al., 2008; Rono et al., 2010), all infection experiments were performed with immune-deficient mosquitoes (Pompon and Levashina, 2015). When mosquitoes were infected with *P. falciparum*, a significant decrease in the size of mature oocysts was observed in Lp-depleted mosquitoes (Figure 1C). Strikingly, inhibition of lipid trafficking led to a 5-fold decrease in the number of salivary gland sporozoites (Figure 1D). Similar effects on sporogony and sporozoite loads were observed for *P. berghei* (Figure 1C and D). Further, the comparable decrease in numbers of midgut and salivary gland sporozoites suggested that Lp depletion inhibited parasite sporogony in the oocysts (Table S1). Taken together, these results show that Lp-mediated lipid trafficking is essential for sporogony of human and rodent *Plasmodium* parasites.

## **Lp-transported lipids are essential for *Plasmodium* sporogonic development**

To investigate how disruption of lipid trafficking affected parasite sporogony, we followed development of *P. berghei* GFP-expressing oocysts by fluorescence microscopy

(Franke-Fayard et al., 2004). A significant decrease in oocyst size was observed in Lp-deficient mosquitoes 7 days post infection (dpi) (Figure 2A), indicating that Lp deficiency arrests parasite growth at the onset of sporogony. We next examined whether oocysts accumulated lipids and the role of Lp in this process. A clear Nile Red signal was observed in the peripheral cytoplasm and vesicles (Figure 2B). Importantly, this signal was absent in the oocysts of Lp-depleted mosquitoes (Figure 2B and Figure S1A), suggesting that Lp is required for parasite provision with mosquito lipids. To investigate whether Lp was taken up by oocysts together with its lipid cargo, we used antibodies directed against the protein moiety of the Lp particle (Rono et al., 2010). In controls, The number of Lp-positive oocysts increased over time (25% and 72% at 7 and 13 dpi, respectively, Figure 2A). Lp signal was observed on the surface but not inside the oocysts (Figure 2C). As expected, no signal was detected in Lp-depleted mosquitoes (Figure 2C). Progressive accumulation of Lp on the parasite surface suggests that *Plasmodium* exploits Lp particles for lipid delivery to the oocysts rather than for uptake. Transmission electron microscopy analysis further confirmed that Lp depletion did not impact development of young oocysts (7 dpi) which displayed normal ultrastructure (Figure 2D and E). Instead, in Lp-depleted mosquitoes, almost half of the mature oocysts displayed cytoplasmic vacuolization and lack of classical membrane retractions characteristic of initiation of sporulation (Figure 2F). Moreover, these aberrant oocysts were surrounded by the electron-dense actin zones associated with dead ookinetes (Shiao et al., 2006) (Figure 2E and Figure S2). Collectively, these observations indicate that lipid restriction inhibits oocyst sporulation and induces the death of mature oocysts. Therefore, mosquito lipids represent a limiting step in parasite development in the midgut.

## **Mosquito lipids control *Plasmodium* virulence to the next mammalian host**

As some sporozoites were able to complete their development in spite of massive oocyst die-off (Figure 1D), we examined the effect of lipid starvation on *Plasmodium* transmission. In these experiments, naïve mice were exposed to the bites of *P. berghei*-infected control or Lp-deficient mosquitoes. We found that only 20% of mice (n=10) bitten by Lp-depleted mosquitoes became blood-stage positive, as compared to 90% in

controls (n=10) (Figure 3A and 3B). To assure that this striking difference in infection levels was not due to the differences in sporozoite loads produced by control and Lp-deficient mosquitoes (Figure 1D), naïve mice were subcutaneously injected with equal numbers of sporozoites isolated from control and Lp-depleted mosquitoes. Again, fewer than 40% of mice (n=18) injected with lipid-deprived sporozoites became infected as compared to 100% in controls (n=16) (Figure 3C). All mice that became infected with sporozoites from Lp-deficient mosquitoes displayed a 1-day delay in the onset of parasitemia (Figure 3D). In addition, only half of the infected mice displayed the severe neurological symptoms typical of experimental cerebral malaria (ECM), and there was a significant delay in ECM development (Figure 3E) compared to control mice, which had 100% incidence of ECM. Overall, mosquito lipid deprivation resulted in a cumulative loss of parasite virulence (Figure 3F). These results strongly suggest that disrupting lipid transport in the mosquito impacts development of *Plasmodium* liver stages and reduces the initial burden of blood stage parasites, thereby preventing initiation of severe forms of the disease.

#### **Supplemental blood feeding rescues parasite infectivity**

To obtain direct evidence of the trans-stadial effect of mosquito lipid deficiency on the *Plasmodium* liver stages, we gauged development of extra-erythrocytic forms (EEFs) in the hepatoma HepG2 cell line *in vitro*. Cells were exposed to equal numbers of sporozoites isolated from control and Lp-depleted mosquitoes (Figure 4A) and the development of EEFs was analyzed by fluorescence microscopy two days later. Consistent with the *in vivo* results, lipid restriction reduced sporozoite infectivity in hepatocytes 4-fold, to levels comparable to those observed after treatment of control sporozoites with cytochalasin D, a potent inhibitor of actin polymerization and *Plasmodium* invasion (Mota et al., 2001) (Figure 4C). Moreover, significantly smaller EEFs were produced by lipid-deprived sporozoites as compared to controls (Figure 4E and G, Figure S3), suggesting a trans-stadial effect of lipid deficiency on EEF growth. Therefore, we hypothesized that providing lipids directly to the midgut at the critical time of oocyst sporogony might restore sporozoite infectivity and EEF development. To test

this hypothesis, *P. berghei*-infected control and Lp-depleted mosquitoes were blood fed 7 dpi, when the first effects of lipid starvation on oocyst size were observed (Figure 2A). Strikingly, even in the absence of Lp (Figure S4), this supplemental feeding partially restored sporozoite numbers in the mosquitoes (Figure 4B), and fully rescued sporozoite infectivity (Figure 4D) and EEF development (Figure 4F and H). As expected, additional blood feeding did not restore ovary development (data not shown), confirming the importance of Lp in lipid trafficking between mosquito organs. Taken together, these results establish a direct link between lipid starvation at the oocyst stage and *Plasmodium* infectivity to the next mammalian host.

### **Mosquito lipids fuel sporozoite mitochondrial membrane potential**

We next examined potential mechanisms that attenuate sporozoite infectivity to the next mammalian host. Microscopic inspection of the overall sporozoite morphology by scanning electron microscopy failed to detect any major differences between control and lipid-deficient sporozoites (Figure S5A). Similarly, no major differences were detected in transcript levels of major regulators of sporozoite development (Figure S5B). Since neutral lipids such as cholesterol regulate trafficking of GPI-anchored proteins to the plasma membrane (Zurzolo and Simons, 2016), we gauged surface distribution of the circumsporozoite protein (CSP), the main surface antigen crucial for sporozoite morphogenesis and infectivity (Menard et al., 1997). Immunofluorescence analysis revealed no differences in the distribution of CSP signal at the surface of lipid-deprived sporozoites compared to controls (Figure S5C). In contrast, a striking effect of lipid deprivation was observed on the sporozoite mitochondrial membrane potential as measured by signal intensity of a lipophilic cationic dye (TMRE) whose accumulation in the mitochondrial membrane matrix space correlates with the mitochondrial membrane potential (Perry et al., 2011). We first validated TMRE staining of sporozoites by measuring signal intensity before and after treatment with a mitochondrial uncoupling drug CCCP and showed that drug treatment abolished TMRE signal (Figure S5D). We next assessed TMRE intensity by imaging flow cytometry analysis of sporozoites. Strikingly, a significant decrease in mitochondrial membrane potential was observed in

lipid-deprived sporozoites as compared to controls (Figure 5A, B and D). To examine whether reduced mitochondrial activity mitigated sporozoite survival, we gauged levels of transgenic GFP expression as a proxy of parasite live status (Yilmaz et al., 2014). Although GFP expression levels differed between experiments, absence of significant differences in GFP signal between the two groups confirmed that all analyzed sporozoites were alive (Figure 5A, C and E). These results demonstrate that mosquito lipids regulate the mitochondrial activity of sporozoites, and suggest that the decrease in mitochondrial membrane potential is responsible for the attenuated infectivity of the lipid-deprived sporozoites in the mammalian host.

## DISCUSSION

Anopheline mosquitoes provide *Plasmodium* parasites a nutritional niche to complete their life cycle. Here we report the crucial role of mosquito lipids in *Plasmodium* metabolism that ultimately regulates parasite infectivity and virulence in the mammalian host. We show that parasites hijack the mosquito nutrient transporter Lp for oocyst provision with neutral lipids. These results are in line with previous reports that observed an association of insect Lp particles with Apicomplexan parasites (Atella et al., 2009; Folly et al., 2003; Ximenes Ados et al., 2015). We demonstrate that mosquito lipids regulate multiple stages of *Plasmodium* development. First morphological anomalies were detected during oocyst sporogony and were mainly characterized by electron-light cytoplasmic vacuolization. Vacuolization is a hallmark of autophagy, a physiological process occurring in normal conditions in a large proportion of *Plasmodium* liver stages (Eickel et al., 2013). Indeed, under unfavorable circumstances such as starvation, liver stage parasites initiate an autophagy-like cell death to reduce competition and ensure the survival of the fittest progeny (Eickel et al., 2013). As in our experiments, a small proportion of oocysts also displayed similar abnormalities in controls, we propose that autophagy is not restricted to the intracellular liver stages, but is a general mechanism of parasite nutrient sensing, exacerbated in our experiments by lipid restriction. Together with the data accumulated for mammalian stages (Grellier et al., 1991; Itoe et al., 2014; Lauer et al., 2000; Sa et al., 2017), our study uncovers the obligatory *Plasmodium*



dependence on host lipids during throughout its life cycle.

In contrast to sporogonic development, lipid restriction did not induce major morphological or transcriptional changes in the transmissible sporozoite stage. Instead, we revealed an unexpected association between mosquito lipid transport and sporozoite mitochondrial membrane potential. Mitochondria are essential eukaryotic organelles that integrate cellular metabolic signals, generate energy and synthesize intermediates of vital macromolecules. In line with our results, *Plasmodium* mutants for mitochondrial pathways are defective in oocyst growth and sporulation (Boysen and Matuschewski, 2011; Goodman et al., 2016; Hino et al., 2012; Oppenheim et al., 2014). Moreover, the widely used antimalarial drug atovaquone, which targets the cytochrome bc1 complex and collapses the mitochondrial membrane potential in *Plasmodium* blood stages (Siregar et al., 2015; Srivastava et al., 1997) also arrests oocyst growth and sporulation, and reduces the number and size of developing EEFs *in vitro* (Azevedo et al., 2017; Davies et al., 1993; Fowler et al., 1995). Taken together with these results, our findings establish the crucial role of mosquito lipids in parasite mitochondrial function, which shapes *Plasmodium* sporogonic development and infectivity.

Attenuation of *Plasmodium* sporozoites is a leading strategy for malaria whole-organism vaccine development (Butler et al., 2012). So far, this has been achieved by irradiation (Seder et al., 2013) or by genetic manipulation (van Schaijk et al., 2014). The data presented here add a new paradigm of virulence attenuation by manipulation of mosquito lipid trafficking. Interestingly, high variability in virulence of *P. falciparum* sporozoites has been reported under laboratory conditions (March et al., 2013) and in the field (Gupta et al., 1994; Mackinnon and Read, 2004). We propose that disparity in lipid resources between larval breeding sites drive fluctuations in mosquito nutritional status (Gillies, 1954), and thereby may account for the observed variability in *Plasmodium* virulence in the field. Therefore, the demonstrated direct correlation between sporozoite quantities and transmission efficiency in naïve and vaccinated hosts (Churcher et al., 2017) should also consider sporozoite quality, both of which depend on the mosquito nutritional status. Finally, targeting host/vector lipid trafficking may offer new potent and powerful strategies to block parasite development in the next host, thereby preventing the vicious

228 cycle of malaria transmission.

229

## 230 **AUTHOR CONTRIBUTIONS**

231 GC and EAL conceived the study and designed the experiments. GC, ME, RL, CG, and  
232 VB performed experiments. AEH and RS contributed reagents and expertise. GC, ME,  
233 RL, RS, CG, VB, and EAL analyzed the data. GC and EAL wrote the manuscript.

234

235

## 236 **ACKNOWLEDGEMENTS**

237

238 This work was supported by EC FP7 EVIMalaR (grant agreement n°242095) and  
239 MALVECBLOK (grant agreement n°223601). The authors thank H. Krüger, M. Andres  
240 and L. Spohr for mosquito rearing, mouse work assistance, and *Plasmodium* infections,  
241 and D. Tschierske and D. Eyermann for *P. falciparum* cultures. Editorial support of Dr.  
242 R. Willmott (Bioscript) is gratefully acknowledged. The authors express their gratitude to  
243 Prof. K. Matuschewski and his group for continuous fruitful discussions and to Dr. M.M.  
244 Mota for helpful comments.

# REFERENCES:

- Atella, G.C., Bittencourt-Cunha, P.R., Nunes, R.D., Shahabuddin, M., and Silva-Neto, M.A. (2009). The major insect lipoprotein is a lipid source to mosquito stages of malaria parasite. *Acta Trop* 109, 159-162.
- Atella, G.C., Silva-Neto, M.A., Golodne, D.M., Arefin, S., and Shahabuddin, M. (2006). *Anopheles gambiae* lipophorin: characterization and role in lipid transport to developing oocyte. *Insect Biochem Mol Biol* 36, 375-386.
- Azevedo, R., Markovic, M., Machado, M., Franke-Fayard, B., Mendes, A.M., and Prudencio, M. (2017). A bioluminescence method for in vitro screening of Plasmodium transmission-blocking compounds. *Antimicrob Agents Chemother*.
- Boysen, K.E., and Matuschewski, K. (2011). Arrested oocyst maturation in Plasmodium parasites lacking type II NADH:ubiquinone dehydrogenase. *J Biol Chem* 286, 32661-32671.
- Butler, N.S., Vaughan, A.M., Harty, J.T., and Kappe, S.H. (2012). Whole parasite vaccination approaches for prevention of malaria infection. *Trends Immunol* 33, 247-254.
- Carroll, R.W., Wainwright, M.S., Kim, K.Y., Kidambi, T., Gomez, N.D., Taylor, T., and Halder, K. (2010). A rapid murine coma and behavior scale for quantitative assessment of murine cerebral malaria. *PLoS One* 5.
- Churcher, T.S., Sinden, R.E., Edwards, N.J., Poulton, I.D., Rampling, T.W., Brock, P.M., Griffin, J.T., Upton, L.M., Zakutansky, S.E., Sala, K.A., *et al.* (2017). Probability of Transmission of Malaria from Mosquito to Human Is Regulated by Mosquito Parasite Density in Naive and Vaccinated Hosts. *PLoS Pathog* 13, e1006108.
- Coppi, A., Tewari, R., Bishop, J.R., Bennett, B.L., Lawrence, R., Esko, J.D., Billker, O., and Sinnis, P. (2007). Heparan sulfate proteoglycans provide a signal to Plasmodium sporozoites to stop migrating and productively invade host cells. *Cell Host Microbe* 2, 316-327.
- Davies, C.S., Pudney, M., Nicholas, J.C., and Sinden, R.E. (1993). The novel hydroxynaphthoquinone 566C80 inhibits the development of liver stages of Plasmodium berghei cultured in vitro. *Parasitology* 106 (Pt 1), 1-6.
- Eickel, N., Kaiser, G., Prado, M., Burda, P.C., Roelli, M., Stanway, R.R., and Heussler, V.T. (2013). Features of autophagic cell death in Plasmodium liver-stage parasites. *Autophagy* 9, 568-580.

278 Folly, E., Cunha e Silva, N.L., Lopes, A.H., Silva-Neto, M.A., and Atella, G.C. (2003).  
 279 Trypanosoma rangeli uptakes the main lipoprotein from the hemolymph of its  
 280 invertebrate host. Biochem Biophys Res Commun 310, 555-561.

281 Fowler, R.E., Sinden, R.E., and Pudney, M. (1995). Inhibitory activity of the anti-  
 282 malarial atovaquone (566C80) against ookinetes, oocysts, and sporozoites of Plasmodium  
 283 berghei. J Parasitol 81, 452-458.

284 Franke-Fayard, B., Trueman, H., Ramesar, J., Mendoza, J., van der Keur, M., van der  
 285 Linden, R., Sinden, R.E., Waters, A.P., and Janse, C.J. (2004). A Plasmodium berghei  
 286 reference line that constitutively expresses GFP at a high level throughout the complete  
 287 life cycle. Mol Biochem Parasitol 137, 23-33.

288 Gillies, M.T. (1954). The recognition of age-groups within populations of Anopheles  
 289 gambiae by the pre-gravid rate and the sporozoite rate. Ann Trop Med Parasitol 48, 58-  
 290 74.

291 Goodman, C.D., Siregar, J.E., Mollard, V., Vega-Rodriguez, J., Syafruddin, D.,  
 292 Matsuoka, H., Matsuzaki, M., Toyama, T., Sturm, A., Cozijnsen, A., et al. (2016).  
 293 Parasites resistant to the antimalarial atovaquone fail to transmit by mosquitoes. Science  
 294 352, 349-353.

295 Grellier, P., Rigomier, D., Clavey, V., Fruchart, J., and Schrevel, J. (1991). Lipid Traffic  
 296 Between High Density Lipoproteins and Plasmodium-falciparum-Infected Red Blood  
 297 Cells. J Cell Biol 112, 267-277.

298 Gupta, S., Hill, A.V.S., Kwiatkowski, D., Greenwood, A.M., Greenwood, B., and Day,  
 299 K. (1994). Parasite virulence and disease patterns in Plasmodium falciparum malaria.  
 300 Proc Natl Acad Sci U S A 91, 3715-3719.

301 Hino, A., Hirai, M., Tanaka, T.Q., Watanabe, Y., Matsuoka, H., and Kita, K. (2012).  
 302 Critical roles of the mitochondrial complex II in oocyst formation of rodent malaria  
 303 parasite Plasmodium berghei. J Biochem 152, 259-268.

304 Itoe, M.A., Sampaio, J.L., Cabal, G.G., Real, E., Zuzarte-Luis, V., March, S., Bhatia,  
 305 S.N., Frischknecht, F., Thiele, C., Shevchenko, A., et al. (2014). Host cell  
 306 phosphatidylcholine is a key mediator of malaria parasite survival during liver stage  
 307 infection. Cell Host Microbe 16, 778-786.

308 Lackner, P., Beer, R., Heussler, V., Goebel, G., Rudzki, D., Helbok, R., Tannich, E., and  
 309 Schmutzhard, E. (2006). Behavioural and histopathological alterations in mice with  
 310 cerebral malaria. Neuropathol Appl Neurobiol 32, 177-188.

311 Lauer, S., VanWye, J., Harrison, T., McManus, H., Samuel, B.U., Hiller, N.L.,  
312 Mohandas, N., and Haldar, K. (2000). Vacuolar uptake of host components, and a role for  
313 cholesterol and sphingomyelin in malarial infection. *EMBO J* 19, 3556-3564.

314 Mackinnon, M.J., and Read, A.F. (2004). Immunity promotes virulence evolution in a  
315 malaria model. *PLoS Biol* 2, E230.

316 March, S., Ng, S., Velmurugan, S., Galstian, A., Shan, J., Logan, D.J., Carpenter, A.E.,  
317 Thomas, D., Sim, B.K., Mota, M.M., *et al.* (2013). A microscale human liver platform  
318 that supports the hepatic stages of *Plasmodium falciparum* and *vivax*. *Cell Host Microbe*  
319 14, 104-115.

320 Menard, R., Sultan, A.A., Cortes, C., Altszuler, R., van Dijk, M.R., Janse, C.J., Waters,  
321 A.P., Nussenzweig, R.S., and Nussenzweig, V. (1997). Circumsporozoite protein is  
322 required for development of malaria sporozoites in mosquitoes. *Nature* 385, 336-340.

323 Mendes, A.M., Schlegelmilch, T., Cohuet, A., Awono-Ambene, P., De Iorio, M.,  
324 Fontenille, D., Morlais, I., Christophides, G.K., Kafatos, F.C., and Vlachou, D. (2008).  
325 Conserved mosquito/parasite interactions affect development of *Plasmodium falciparum*  
326 in Africa. *PLoS Pathog* 4, e1000069.

327 Moller-Jacobs, L.L., Murdock, C.C., and Thomas, M.B. (2014). Capacity of mosquitoes  
328 to transmit malaria depends on larval environment. *Parasites & vectors* 7, 593.

329 Mota, M.M., Pradel, G., Vanderberg, J.P., Hafalla, J.C., Frevert, U., Nussenzweig, R.S.,  
330 Nussenzweig, V., and Rodriguez, A. (2001). Migration of *Plasmodium* sporozoites  
331 through cells before infection. *Science* 291, 141-144.

332 Muller, K., Matuschewski, K., and Silvie, O. (2011). The Puf-family RNA-binding  
333 protein Puf2 controls sporozoite conversion to liver stages in the malaria parasite. *PloS*  
334 *one* 6, e19860.

335 Okech, B.A., Gouagna, L.C., Kabiru, E.W., Beier, J.C., Yan, G., and Githure, J.I. (2004).  
336 Influence of age and previous diet of *Anopheles gambiae* on the infectivity of natural  
337 *Plasmodium falciparum* gametocytes from human volunteers. *Journal of insect science* 4,  
338 33.

339 Oppenheim, R.D., Creek, D.J., Macrae, J.I., Modrzynska, K.K., Pino, P., Limenitakis, J.,  
340 Polonais, V., Seeber, F., Barrett, M.P., Billker, O., *et al.* (2014). BCKDH: the missing  
341 link in apicomplexan mitochondrial metabolism is required for full virulence of  
342 *Toxoplasma gondii* and *Plasmodium berghei*. *PLoS Pathog* 10, e1004263.

343 Perry, S.W., Norman, J.P., Barbieri, J., Brown, E.B., and Gelbard, H.A. (2011).  
 344 Mitochondrial membrane potential probes and the proton gradient: a practical usage  
 345 guide. *BioTechniques* 50, 98-115.

346 Pompon, J., and Levashina, E.A. (2015). A New Role of the Mosquito Complement-like  
 347 Cascade in Male Fertility in *Anopheles gambiae*. *PLoS Biol* 13, e1002255.

348 Ponnudurai, T., Lensen, A.H., van Gemert, G.J., Bensink, M.P., Bolmer, M., and  
 349 Meuwissen, J.H. (1989). Sporozoite load of mosquitoes infected with *Plasmodium*  
 350 *falciparum*. *Trans R Soc Trop Med Hyg* 83, 67-70.

351 Rono, M.K., Whitten, M.M., Oulad-Abdelghani, M., Levashina, E.A., and Marois, E.  
 352 (2010). The major yolk protein vitellogenin interferes with the anti-*Plasmodium* response  
 353 in the malaria mosquito *Anopheles gambiae*. *PLoS Biol* 8, e1000434.

354 Rudolf, M., and Curcio, C.A. (2009). Esterified cholesterol is highly localized to Bruch's  
 355 membrane, as revealed by lipid histochemistry in wholemounts of human choroid. *J*  
 356 *Histochem Cytochem* 57, 731-739.

357 Sa, E.C.C., Nyboer, B., Heiss, K., Sanches-Vaz, M., Fontinha, D., Wiedtke, E., Grimm,  
 358 D., Przyborski, J.M., Mota, M.M., Prudencio, M., *et al.* (2017). *Plasmodium berghei*  
 359 EXP-1 interacts with host Apolipoprotein H during *Plasmodium* liver-stage development.  
 360 *Proc Natl Acad Sci U S A* 114, E1138-E1147.

361 Seder, R.A., Chang, L.J., Enama, M.E., Zephir, K.L., Sarwar, U.N., Gordon, I.J.,  
 362 Holman, L.A., James, E.R., Billingsley, P.F., Gunasekera, A., *et al.* (2013). Protection  
 363 against malaria by intravenous immunization with a nonreplicating sporozoite vaccine.  
 364 *Science* 341, 1359-1365.

365 Shapiro, L.L., Murdock, C.C., Jacobs, G.R., Thomas, R.J., and Thomas, M.B. (2016).  
 366 Larval food quantity affects the capacity of adult mosquitoes to transmit human malaria.  
 367 *Proc Biol Sci* 283.

368 Shiao, S.H., Whitten, M.M., Zachary, D., Hoffmann, J.A., and Levashina, E.A. (2006).  
 369 *Fz2* and *cdc42* mediate melanization and actin polymerization but are dispensable for  
 370 *Plasmodium* killing in the mosquito midgut. *PLoS Pathog* 2, e133.

371 Silvie, O., Goetz, K., and Matuschewski, K. (2008). A sporozoite asparagine-rich protein  
 372 controls initiation of *Plasmodium* liver stage development. *PLoS Pathog* 4, e1000086.

373 Siregar, J.E., Kurisu, G., Kobayashi, T., Matsuzaki, M., Sakamoto, K., Mi-ichi, F.,  
 374 Watanabe, Y., Hirai, M., Matsuoka, H., Syafruddin, D., *et al.* (2015). Direct evidence for

375 the atovaquone action on the Plasmodium cytochrome bc1 complex. *Parasitol Int* 64,  
376 295-300.

377 Srivastava, I.K., Rottenberg, H., and Vaidya, A.B. (1997). Atovaquone, a broad spectrum  
378 antiparasitic drug, collapses mitochondrial membrane potential in a malarial parasite. *J*  
379 *Biol Chem* 272, 3961-3966.

380 Takken, W., Smallegange, R.C., Vigneau, A.J., Johnston, V., Brown, M., Mordue-Luntz,  
381 A.J., and Billingsley, P.F. (2013). Larval nutrition differentially affects adult fitness and  
382 *Plasmodium* development in the malaria vectors *Anopheles gambiae* and *Anopheles*  
383 *stephensi*. *Parasites & vectors* 6, 345.

384 Van der Horst, D.J., Roosendaal, S.D., and Rodenburg, K.W. (2009). Circulatory lipid  
385 transport: lipoprotein assembly and function from an evolutionary perspective. *Mol Cell*  
386 *Biochem* 326, 105-119.

387 van Schaijk, B.C., Ploemen, I.H., Annoura, T., Vos, M.W., Foquet, L., van Gemert, G.J.,  
388 Chevalley-Maurel, S., van de Vegte-Bolmer, M., Sajid, M., Franetich, J.F., *et al.* (2014).  
389 A genetically attenuated malaria vaccine candidate based on *P. falciparum* b9/slarp gene-  
390 deficient sporozoites. *eLife* 3.

391 Vantaux, A., Lefevre, T., Cohuet, A., Dabire, K.R., Roche, B., and Roux, O. (2016).  
392 Larval nutritional stress affects vector life history traits and human malaria transmission.  
393 *Sci Rep* 6, 36778.

394 Ximenes Ados, A., Silva-Cardoso, L., De Cicco, N.N., Pereira, M.G., Lourenco, D.C.,  
395 Fampa, P., Folly, E., Cunha-e-Silva, N.L., Silva-Neto, M.A., and Atella, G.C. (2015).  
396 Lipophorin Drives Lipid Incorporation and Metabolism in Insect Trypanosomatids.  
397 *Protist* 166, 297-309.

398 Yilmaz, B., Portugal, S., Tran, T.M., Gozzelino, R., Ramos, S., Gomes, J., Regalado, A.,  
399 Cowan, P.J., d'Apice, A.J., Chong, A.S., *et al.* (2014). Gut microbiota elicits a protective  
400 immune response against malaria transmission. *Cell* 159, 1277-1289.

401 Yuda, M., Iwanaga, S., Shigenobu, S., Kato, T., and Kaneko, I. (2010). Transcription  
402 factor AP2-Sp and its target genes in malarial sporozoites. *Mol Microbiol* 75, 854-863.

403 Zurzolo, C., and Simons, K. (2016). Glycosylphosphatidylinositol-anchored proteins:  
404 Membrane organization and transport. *Biochim Biophys Acta* 1858, 632-639.

405  
406 Zurzolo, C., and Simons, K. (2016). Glycosylphosphatidylinositol-anchored proteins:  
407 Membrane organization and transport. *Biochim Biophys Acta* 1858, 632-639.

408  
409



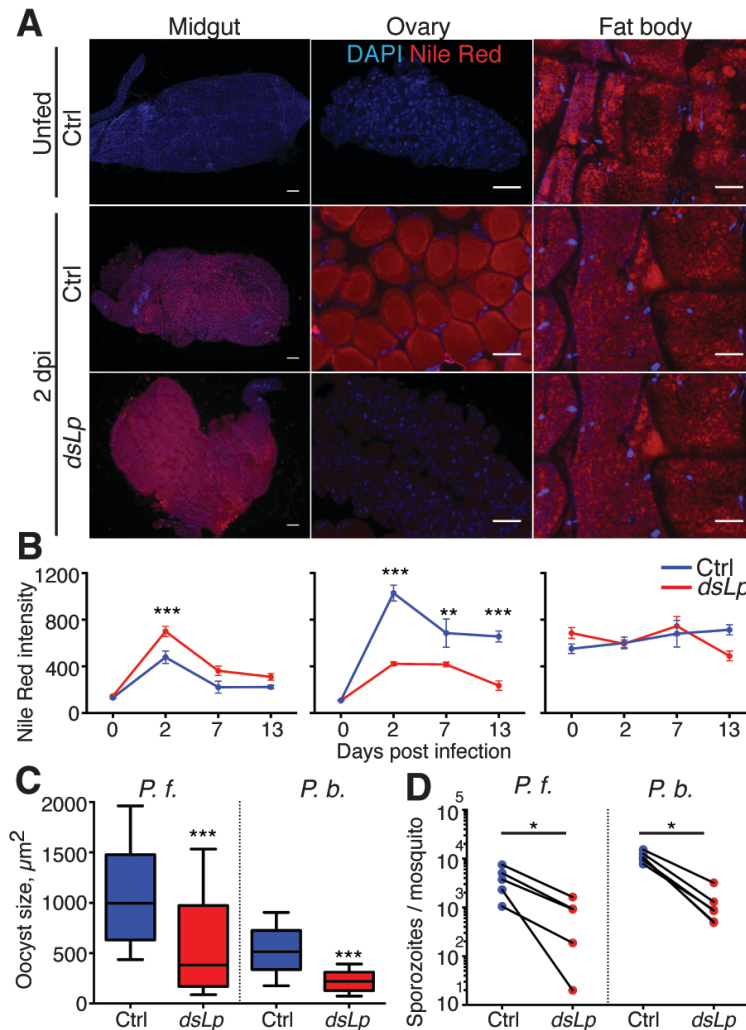

**Figure 1. Effect of mosquito lipid trafficking on *Plasmodium* sporogony.**

Distribution of neutral lipids (Nile Red dye) in the midgut, ovaries, and fat body of control (Ctrl) and Lp-deficient (*dsLp*) mosquitoes. (A) Representative fluorescence micrographs of female abdomens of control and Lp-depleted mosquitoes dissected before (unfed), 2, 7 and 13 days post *Plasmodium* infection (dpi). Neutral lipids are stained by Nile Red (red) and cell nuclei are in blue (DAPI). Scale bar - 100  $\mu\text{m}$ . (B) Intensity of the Nile Red staining was measured in the midgut, ovaries, and fat body of control and Lp-depleted mosquitoes. Each data point represents the mean intensity of Nile Red signal  $\pm$  SEM per midgut ( $n \geq 3$ ). Control and Lp-deficient females were infected with *P. falciparum* (*P.f.*) or *P. berghei* (*P.b.*). (C) Sizes of *P.f.* (11 dpi,  $n=3$ ) and *P.b.* (14 dpi,  $n=6$ ) oocysts in control and Lp-depleted mosquitoes. At least 225 oocysts were measured



per condition. The box plots represent medians (horizontal bars) with 10th and 90th percentiles. **(D)** Development of *P.f.* (14 dpi, n=5) and *P.b.* (18 dpi, n=4) salivary gland sporozoites in control and Lp-depleted mosquitoes. Each point represents the mean number of sporozoites per mosquito for each experimental replicate. Asterisks indicate statistically significant differences (Mann-Whitney test and 2-way ANOVA, \*p<0.05; \*\*p<0.001; \*\*\*p<0.0001).

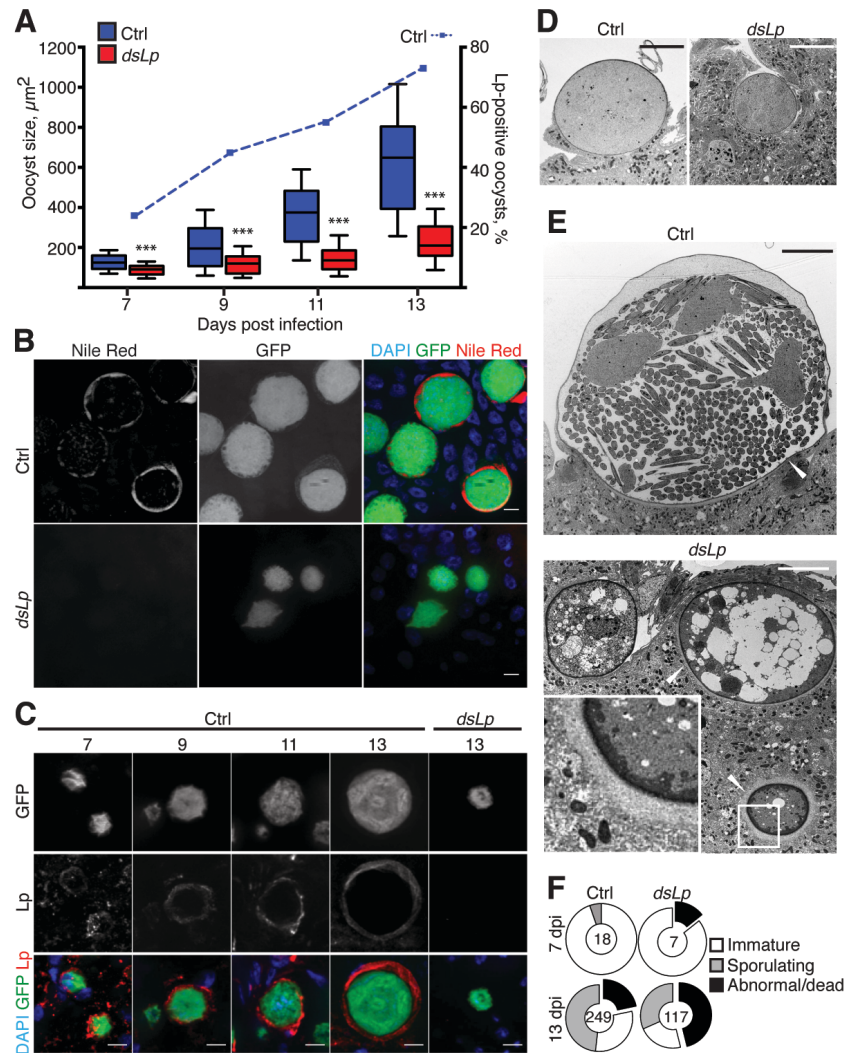

**Figure 2. Disruption of mosquito lipid trafficking impairs *Plasmodium* sporogony.**

Control (Ctrl) and Lp-deficient (*dsLp*) females were infected with *P. berghei* and the oocyst sizes, morphology, lipid, and Lp uptake were gauged by fluorescence and transmission electron microscopy. (A) Time-series analysis of oocyst development in control (blue) and Lp-depleted (red) mosquitoes. At least 5 mosquitoes were dissected per time point and per condition (n=2). The box plots represent medians (horizontal bars) with 10th and 90th percentiles. (B) Neutral lipids (red) detected by the Nile Red dye inside the GFP-expressing *P. berghei* oocysts (green) 14 dpi in control and Lp-depleted mosquitoes. Nuclei are visualized by DAPI (blue). Scale bars - 10  $\mu\text{m}$ . (C) Lp accumulation (red) on the GFP-expressing oocysts (green) in the midguts of control *P. berghei*-infected mosquitoes revealed by immunofluorescence analysis using anti-Lp

antibodies at 7, 9, 11, and 13 days post infection (dpi). No Lp signal was observed in Lp-depleted mosquitoes. Nuclei are visualized by DAPI (blue). Scale bars - 10  $\mu$ m. Representative transmission electron micrographs of *P. berghei* oocysts in control and Lp-depleted mosquitoes 7 (**D**) and 13 (**E**) dpi. White arrowheads point to the membranous structures in control and to the electron-dense actin-zone in Lp-depleted mosquitoes. Scale bars - 10  $\mu$ m. (**F**) Oocysts detected by transmission electron microscopy were scored according to the developmental stage: non-sporulating oocysts with normal morphology (immature, white); oocysts with normal plasma membrane retraction, budding sporoblasts, or formed sporozoites (sporulating, gray); oocysts with aberrant electron-light intracellular vacuolization (abnormal/dead, black). Proportions of the categories are shown as pie charts and the total numbers of analyzed oocysts per condition are indicated in the middle of each chart. Asterisks indicate statistically significant differences (Kruskal-Wallis test, \*\*\* $p < 0.0001$ ).

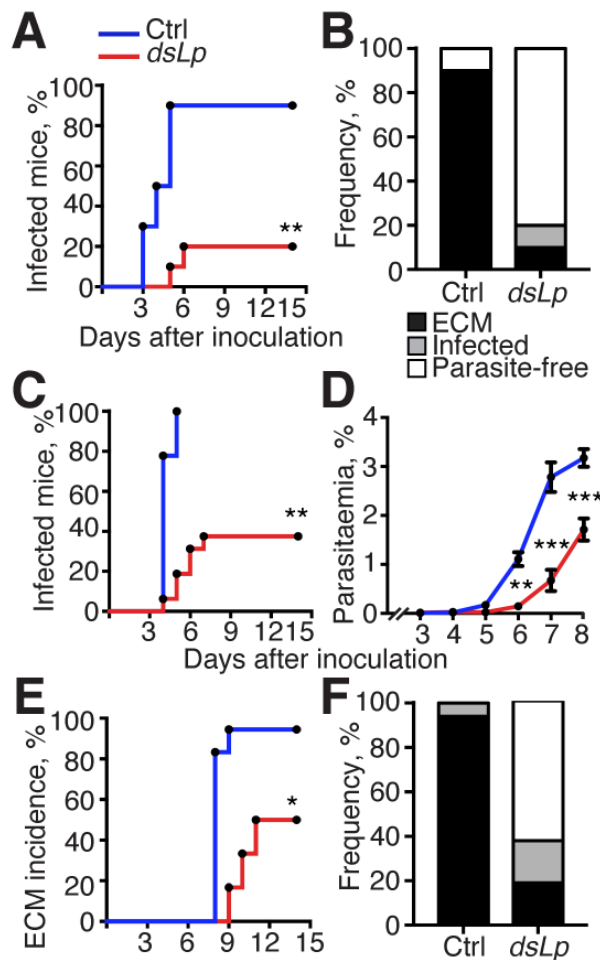

**Figure 3. Mosquito lipids determine *Plasmodium* virulence in mammalian hosts.**

C57BL/6 mice were infected with *P. berghei* and monitored daily for parasite occurrence in the blood by Giemsa staining of thin blood smears and by FACS and experimental cerebral malaria symptoms (ECM) malaria symptoms. (A) Kaplan-Meier analysis of time to malaria and (B) cumulative health status frequencies of mice infected by control (CTRL, blue line, n=10) or Lp-depleted (*dsLp*, red line, n=10) mosquitoes via direct bite. (C) Kaplan-Meier analysis of time to malaria, (D) means and SEM of parasitemia, (E) percentage of experimental cerebral malaria (ECM) incidence and (F) cumulative health status frequencies of mice infected by subcutaneous injection of 5,000 sporozoites dissected from the salivary glands of control (CTRL, blue line, n=18) or Lp-depleted (*dsLp*, red line, n=16) mosquitoes. Asterisks indicate statistically significant differences (log-rank Mantel-Cox test and 2-way ANOVA \*p<0.05; \*\*p<0.001, \*\*\*p<0.0001).

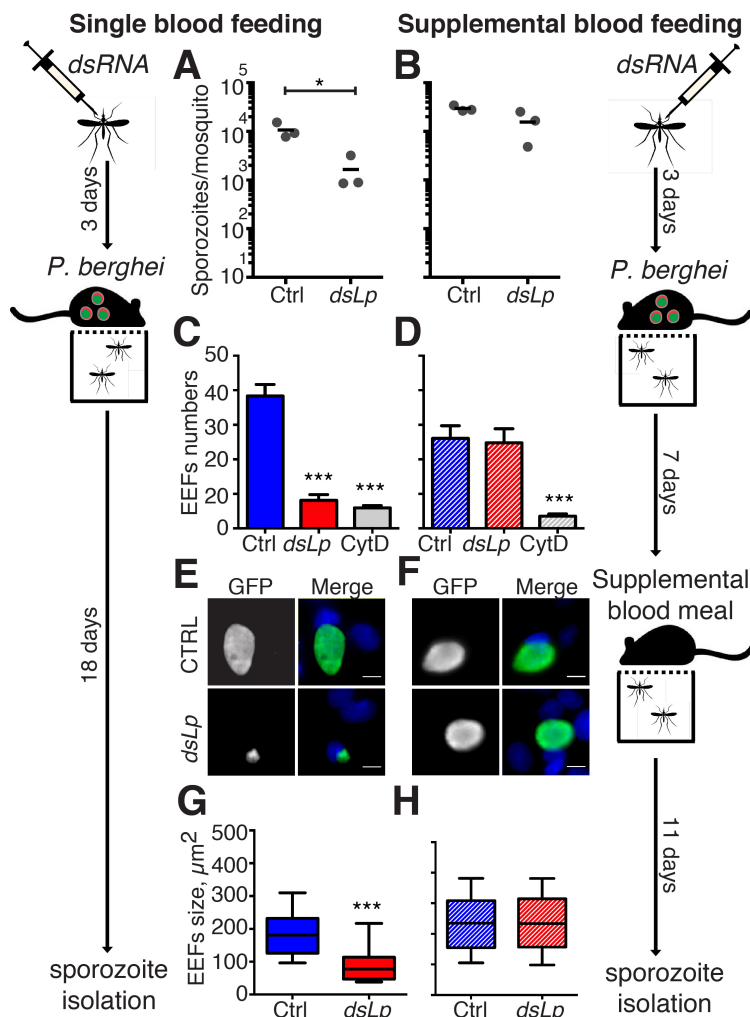

**Figure 4. Mosquito lipids attenuate sporozoite infectivity to hepatocytes.**

Lp-depleted mosquitoes (*dsLp*) and controls (CTRL) were infected with *P. berghei* and offered (B, D, F and H) or not (A, C, E and G) a supplemental blood meal 7 days post infection. (A and B) Salivary gland sporozoites were isolated and counted from control and Lp-deficient mosquitoes. (C and D) Human hepatoma HepG2 cells were infected with 10,000 sporozoites and the number of extra-erythrocytic forms (EEFs) per field was gauged by microscopy 2 dpi. As a negative control, sporozoites from control mosquitoes were treated with cytochalasin D (Cyt D). Mean numbers and SEM are shown. (E and F) Representative fluorescent micrographs of GFP-expressing EEFs (green) developing in HepG2 cells. Cell nuclei are stained with DAPI (blue). Scale bar - 10  $\mu\text{m}$ . (G and H) EEF

485 sizes produced by sporozoites from control and Lp-deficient mosquitoes. The box plots  
 486 represent 10th and 90th percentiles while the horizontal lines show medians. Asterisks  
 487 indicate statistically significant differences (n=3, Kruskal-Wallis and Mann-Whitney test,  
 488 \*p<0.05; \*\*\*p<0.0001).

489

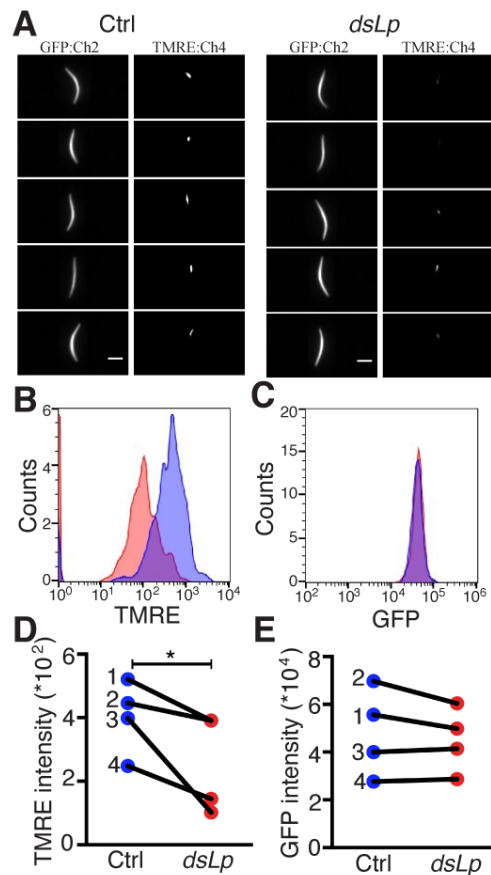

**Figure 5. Mosquito lipids regulate sporozoite mitochondrial membrane potential.**

(A) Sporozoite GFP expression and mitochondrial membrane potential as measured by TMRE staining were analysed using imaging flow cytometry. Representative images of control (Ctrl) and lipid-depleted (*dsLp*) sporozoites are shown. Scale bars - 5  $\mu$ m. Histograms from one representative experiment (3, 270 events per condition) showing (B) TMRE signal (Bright Detail Intensity R7 of Channel 4) or (C) GFP (Intensity MC of Channel 2) in control (blue) and lipid-depleted (red) sporozoites. Geometrical mean values of (D) Bright Detail Intensity R7 of Channel 4 or (E) Intensity MC of Channel 2 from four independent experiments in control (blue, N=1405) and lipid-depleted (red, N=593) sporozoites. Asterisks indicate statistically significant differences (Paired t test, \* $p$ <0.05).

## EXPERIMENTAL PROCEDURES

### Mosquito Rearing and Parasite Infections

*Anopheles gambiae* s.l. mosquitoes were used throughout the study. G3 and 7b lines - an immunocompromised transgenic mosquito line of G3 origin in which expression of the complement-like gene TEP1 is down-regulated (Pompon and Levashina, 2015), were maintained at 29°C 70%–80% humidity 12/12 h day/night cycle. In *P. falciparum* infections, mosquitoes were fed at 37°C for 15 min through a membrane feeder with NF54 gametocytes cultured with O+ human red blood cells (Haema, Berlin), and thereafter kept in a secured S3 laboratory according to the national regulations (Landesamt für Gesundheit und Soziales, project number 411/08). For *P. berghei* experiments, mosquitoes were fed on anesthetized CD1 mice infected with the *P. berghei* GFP-con 259cl2 clone (ANKA strain) that constitutively expresses GFP (Franke-Fayard et al., 2004). Shortly after infections, unfed mosquitoes were removed, while fed mosquitoes were maintained at 26°C for 11-14 days (*P. falciparum*) or at 20°C for 7-21 days (*P. berghei*), and then used for the midgut and/or the salivary gland dissections.

### RNAi silencing

Double stranded RNA (dsRNA) against *lipophorin* (*dsLp*) was produced as previously described (Rono et al., 2010). For RNAi silencing, 1-2 day-old females were anesthetized with CO<sub>2</sub> and injected with 69 nl of 3 µg/µl *dsLacZ* (control) or *dsLp* using a Nanoject II Injector (Drummond). Mosquitoes recovered for 3-4 days following injection before infections. Efficiencies of RNAi silencing are summarized in Figure S5.

### Immunofluorescence Analysis

Mosquito midguts were dissected in PBS, fixed in 4% formaldehyde and washed in PBS. Tissues were permeabilized with Triton X-100 0.1% and incubated with a 1:1 mix of mouse monoclonal anti-ApoI and anti-ApoII antibodies (1/300, clones 2H5 and 2C6)



(Rono et al., 2010) overnight at 4°C followed by incubation for 40 min at room temperature with the secondary Cy3-labeled antibodies at 1/1,000 (Molecular Probes), or with 0.1 µg/ml of the Nile Red dye (Sigma Aldrich). Nuclei were stained with DAPI (1.25 µg/ml, Molecular Probes) for 40-60 min at room temperature. Images were acquired using an AxioObserver Z1 fluorescence microscope equipped with an Apotome module (Zeiss). Oocyst sizes were measured by hand-designing a circular ROI of randomly selected oocysts (identified by GFP for *P. berghei* or by bright field and DAPI staining for *P. falciparum*) using ZEN 2012 software (Zeiss). Images were then processed by FIJI software (ImageJ 1.47m).

## Transmission and Scanning Electron Microscopy

Infected midguts were dissected in PBS, embedded in a drop of low melting agarose (4%) and fixed overnight in 2.5% EM grade glutaraldehyde at 4°C. Midguts were postfixed in 0.5% osmium tetroxide, contrasted with tannic acid and 2% uranyl acetate, dehydrated, and embedded in epoxy resin. After polymerization, sections were cut at 60 nm and contrasted with lead citrate. Specimens were analyzed in a Leo 906E transmission electron microscope at 100KV (Zeiss) using digital camera (Morada).

## *P. berghei* liver-stage development *in vitro*

The salivary glands and midguts of *P. berghei* infected mosquitoes were dissected, sporozoites were collected into RPMI medium (Gibco) 3% bovine serum albumin (Sigma Aldrich) and enumerated with a hemocytometer. The *P. berghei* liver stages were cultured *in vitro* in HepG2 hepatoma cells and analyzed using standard techniques (Silvie et al., 2008). In short, 15,000 - 20,000 HepG2 cells per well (70% confluence) were plated in the transparent-bottom 96-wells plates (Nalgene International) and incubated for 24 h, then seeded with 10,000 sporozoites and left at 37°C for 2 h. Non-invading sporozoites were removed by washing. As a negative control, sporozoites isolated from control mosquitoes were pre-treated with the inhibitor of actin polymerization

Cytochalasin D (Sigma Aldrich) for 10 min. At 48 h post seeding, the cells were fixed for 10 min with 4% formaldehyde, washed with PBS and blocked with 10% fetal calf serum in PBS. Development of the liver-stage parasites was examined using monoclonal mouse anti-GFP antibodies (1/1,000, AbCam) and revealed with the secondary AlexaFluor488 conjugated anti-mouse antibody (1/1,000, Molecular Probes). Nuclei were stained with DAPI (1.25 µg/ml, Molecular Probes). Images were recorded directly on the 96-wells plate using an AxioObserver Z1 fluorescence microscope equipped with an Apotome module (Zeiss) and analyzed for number and size of liver forms using the Axio-Vision ZEN 2012 software (Zeiss).

### ***P. berghei* mouse infections *in vivo***

Mice were housed and handled in accordance with the German Animal Protection Law (§8 Tierschutzgesetz) and both institutional (Max Planck Society) and national regulations (Landesamt für Gesundheit und Soziales, registration number H 0027/12). To determine sporozoite infectivity to mice, the sporozoites collected from the mosquito salivary glands (5,000 sporozoites/mouse) were injected subcutaneously into the tails of 8-10-week-old C57BL/6 females. Bite-back experiments were performed by feeding the *P. berghei*-infected mosquitoes (18 dpi) on anesthetized naïve C57BL/6 mice (mean 9 bites/mouse, range 2-15). Blood cell parasitemia was determined by daily Giemsa staining of thin blood smears and FACS analysis of the red blood cells with the GFP-expressing blood stage parasites. Infected mice were monitored every 6-12 h for the appearance of severe neurological and behavioral symptoms typical of experimental cerebral malaria (ECM) such as hunched body position, grooming alteration, ataxia, paralysis, or convulsions (Lackner et al., 2006) or by the rapid neurological and behavioral test (RMCBS) (Carroll et al., 2010). All mice with ECM symptoms or the RMCBS score equal or below 5/20 were sacrificed immediately.

### **Sporozoite imaging flow cytometry**

Salivary gland sporozoites were purified in RPMI medium (Gibco) 3% bovine serum albumin (Sigma Aldrich) and kept on ice until staining. Sporozoites were diluted in PBS to concentrations corresponding to 3 mosquito equivalents and stained in the dark with 5 nM TMRE (Cell Signalling Technology) for 20 min at 20°C. CCCP at 50  $\mu$ M was used as a negative control (see Figure S5D). Sporozoite images were acquired without washing using an ImageStreamX Mk II (Merck Millipore) with a 60x objective over 1 h period. To avoid a possible bias due to the variable pre-acquisition waiting times on ice, the order of sample acquisition was swapped in half of the experimental replicates. GFP-expressing sporozoites were gated by size (Area\_M01 or Area\_M02) and by GFP intensity (Intensity\_MC\_Ch02). The analysis was performed with IDEAS 6.2 (Merck Millipore) and FCS files were exported and analyzed by FlowJo v10. Given the small size of the sporozoite mitochondria, the feature finder tool from IDEAS software was used to improve gating of optimally focused sporozoites. The following parameters were used to discriminate focused single sporozoites from debris, and to identify sporozoites sharply focused enough to resolve their mitochondria: H Entropy Std\_M01\_Ch01\_15 over H Variance Std\_M01\_Ch01, Aspect Ratio\_M02 over Symmetry 4-Object(M02,Ch2)\_Ch02, Gradient RMS-M01-Ch01 over H Correlation Mean-M02-Ch02\_3, and Gradient RMS-M02\_Ch02. Briefly, these parameters respectively measure brightfield image texture, GFP image shape, and brightfield and GFP focus. For measurement of mitochondrial membrane potential and GFP intensity, each sample was time-gated to exclude events with prolonged live staining. The parameter corresponding to the lowest background signal in unstained sporozoites was Bright Detail Intensity R7\_M04\_Ch04, Geo Mean which was selected as *bona fide* TMRE intensity readout (see Figure S5D). For GFP intensity the Intensity\_MC\_Ch02, Geo. Mean was used.

## Statistical analysis

Statistical analysis were performed using GraphPad Prism 7 software and p values < 0.05 were considered significant (\*: p<0.05; \*\*: p<0.001; \*\*\*: p<0.0001) and indicated in the figures. The specific tests used are indicated for each figure in the corresponding legend.
